# Supplementary material
Source: publisher figshare collection journal article supplement (https://asha.figshare.com/articles/dataset/_/20044457)
Supplement: Supplementary file 1 [file 1]

**Supplemental Material S1.** A summary of survey study results provided by HHPs in relation to the implementation of speech testing practices in adult audiology across the world.

| Study                                                | Country      | HHPs | Use of Speech Tests                                                                                                                                                                                                 | Transducer                                               | Use/Barriers                                                                                                                                                                                                                                                                                                                                                  |
|------------------------------------------------------|--------------|------|---------------------------------------------------------------------------------------------------------------------------------------------------------------------------------------------------------------------|----------------------------------------------------------|---------------------------------------------------------------------------------------------------------------------------------------------------------------------------------------------------------------------------------------------------------------------------------------------------------------------------------------------------------------|
| (Martin et al., 1998)                                | USA          | 218  | SDT: 69%<br>SRT: 99.5%                                                                                                                                                                                              | Monitored live voice: 94%                                | N/A                                                                                                                                                                                                                                                                                                                                                           |
| (DeBow & Green, 2000)                                | Canada       | 115  | Word recognition threshold measures: 85%                                                                                                                                                                            | Monitored live voice: 89%<br>Supra-aural headphones: 90% | N/A                                                                                                                                                                                                                                                                                                                                                           |
| (Kirkwood, 2005)                                     | USA          | 674  | Speech audiometry:<br>Never: 1.2%, half the time: 1.2%, always: 90.8%                                                                                                                                               | N/A                                                      | N/A                                                                                                                                                                                                                                                                                                                                                           |
| (Easwar et al., 2013)                                | India        | 199  | SRT only: 24%<br>SRT & speech identification: 38.7%<br>SRT & SIN: 2.5%<br>SIN only: 2%<br>No routine speech tests: 19%                                                                                              | N/A                                                      | N/A                                                                                                                                                                                                                                                                                                                                                           |
| (Nandurkar et al., 2015)                             | India        | 59   | Speech perception tests:<br>Always: 22%, often: 34%, sometimes: 36%, rarely/never: 8%<br>SIN: Always: 5%, often: 29%, sometimes: 34%, rarely: 17%                                                                   | Headphones: 21%<br>Sound-field: 15%                      | Reasons for using speech tests: assess hearing aid efficacy: 76%, hearing aid candidacy assessment: 63%, assessing patient difficulties: 52%, diagnostics: 39%<br>Barriers: Time constraints, lack of adequate material, lack of ideal setting, lack of proficiency in the client's first language                                                            |
| (Alanazi, 2017)                                      | Saudi Arabia | 23   | SRT: 65%<br>SDT: 48%<br>SIN: 0%                                                                                                                                                                                     | N/A                                                      | N/A                                                                                                                                                                                                                                                                                                                                                           |
| (Ali et al., 2017)                                   | Malaysia     | 111  | Speech audiometry:<br>Never: 62.24%, half the time: 26.53%, usually/always: 11.22%                                                                                                                                  | N/A                                                      | N/A                                                                                                                                                                                                                                                                                                                                                           |
| (Myles, 2017)                                        | Australia    | 312  | AB word lists:<br>Routine use: 95%<br>In quiet: 99.6%, in noise: 5%                                                                                                                                                 | Live voice: 2%, ear specific transducer: 66%,            | Reasons for use:<br>Cross-check pure tone audiogram: 96%, diagnostic: 83%, counselling: 87%, protocol requirement: 63%, rehabilitative: 79%                                                                                                                                                                                                                   |
| (American Speech-Language-Hearing Association, 2019) | USA          | 751  | Implementation of SIN testing to validate treatment outcomes:<br>Daily/weekly: 35%<br>Monthly: 26%<br>Never: 39%                                                                                                    | N/A                                                      | N/A                                                                                                                                                                                                                                                                                                                                                           |
| (Anderson et al., 2018)                              | USA          | 251  | Initial hearing aid fitting:<br>SRT & word recognition: 98%<br>Unaided SIN: 80%<br>Aided SIN: 66% (often or sometimes)<br><br>Fine tuning of hearing aids:<br>SIN: 67%<br>Speech-in-quiet: 66% (often or sometimes) | N/A                                                      | N/A                                                                                                                                                                                                                                                                                                                                                           |
| (Thakor, 2020)                                       | South Africa | 107  | SRT: Never: 13%, rarely: 7%, occasionally: 5%, sometimes: 7%, frequently: 9%, usually: 12%, always: 47%<br><br>SIN: 36%                                                                                             | Live voice: 82%<br>Pre-recorded: 8%                      | Use of SRT: calculating the correlation with the PTA, part of departmental/practice assessment protocol, to obtain a level from which to calculate the presentation level for other speech tests, counselling tool.<br>Use of SIN: patient counselling, managing patient expectations.<br>Barriers: language differences, lack of equipment, time constraints |

SRT: Speech recognition threshold, SDT: Speech detection threshold, SIN: Speech-in-noise tests, AB: Arthur Boothroyd

## References

- Alanazi, A.A. (2017). Audiology and speech-language pathology practice in Saudi Arabia. *Int J Health Sci (Qassim)*, 11(5), 43-55.
- Ali, A., Hickson, L., & Meyer, C. (2017). Audiological management of adults with hearing impairment in Malaysia. *International Journal of Audiology*, 56(6), 408-416. doi:10.1080/14992027.2017.1305515
- American Speech-Language-Hearing Association. (2019). Audiology survey report: private practice. Retrieved from <https://www.asha.org/siteassets/surveys/>
- Anderson, M.C., Arehart, K.H., & Souza, P.E. (2018). Survey of Current Practice in the Fitting and Fine-Tuning of Common Signal-Processing Features in Hearing Aids for Adults. *J Am Acad Audiol*, 29(2), 118-124. doi:10.3766/jaaa.16107
- DeBow, A., & Green, W. (2000). A Survey of Canadian Audiological Practices : Pure Tone and Speech Audiometry. *Canadian Journal of Speech-Language Pathology and Audiology*, 24(4), 153-161.
- Easwar, V., Boothalingam, S., Chundu, S., Manchaiah, V., & Ismail, S. (2013). Audiological Practice in India: An Internet-Based Survey of Audiologists. *Indian Journal of Otolaryngology and Head & Neck Surgery*, 65. doi:10.1007/s12070-013-0674-2
- Kirkwood, D.H. (2005). When it comes to hearing aids, "more" was the story in '04. *The Hearing Journal*, 58(5). Retrieved from [https://journals.lww.com/thehearingjournal/Fulltext/2005/05000/When\\_it\\_comes\\_to\\_hearing\\_aids,\\_more\\_was\\_the.5.aspx](https://journals.lww.com/thehearingjournal/Fulltext/2005/05000/When_it_comes_to_hearing_aids,_more_was_the.5.aspx)
- Martin, F., Champlin, C., & Chambers, J. (1998). Seventh survey of audiometric practices in the United States. *Journal of the American Academy of Audiology*, 9(2), 95.
- Myles, A.J. (2017). The clinical use of Arthur Boothroyd (AB) word lists in Australia: exploring evidence-based practice. *International Journal of Audiology*, 56(11), 870-875. doi:10.1080/14992027.2017.1327123
- Nandurkar, A., Mukundan, G., & Gore, G. (2015). Speech perception assessment practices among Audiologists in India: A Preliminary survey. *International Journal of Speech and Language Pathology and Audiology*, 3, 52-65.
- Thakor, H. (2020). *South African Audiologists' Use of Speech-in-Noise Testing for Adults with Hearing Difficulties*. (MSc Audiology). University of the Witwatersrand,
