# Supplementary material
Source: publisher figshare collection journal article supplement (https://asha.figshare.com/articles/dataset/_/20044457)
Supplement: Supplementary file 3 [file 1]

**Supplemental Material S2.** Survey: Speech testing in Adult Audiology (UK)

- 1) Do you work in an NHS or private sector audiology department?  
**[This survey is only suitable for clinicians working in the U.K.]**
  - a. Private sector
  - b. NHS (public sector)
  - c. Other (please specify)
- 2) What type of patients do you assess in your clinic?
  - a. Adults
  - b. Children
  - c. Both adults and children
- 3) When seeing an adult patient in audiology for the first time do you perform any kind of speech perception testing as part of the assessment process?
  - a. Never
  - b. Rarely
  - c. Sometimes
  - d. Often
  - e. Always
- 4) If applicable- What type of speech tests do you perform at the first (assessment) appointment?
  - a. Speech audiometry (speech recognition threshold)
  - b. Quick-SIN
  - c. Lisn-S
  - d. AB words
  - e. BKB Speech in Noise Test
  - f. N/A
  - g. Other (please specify)
- 5) When fitting an adult patient with hearing aids do you perform any kind of speech testing on the day of the fitting or at the follow up appointment?
  - a. Never
  - b. Rarely
  - c. Sometimes
  - d. Often
  - e. Always
- 6) If applicable- What type of speech testing do you carry out at the time of hearing aid fitting or follow up?
  - a. Speech audiometry (speech recognition threshold)
  - b. Quick-SIN
  - c. Lisn-S
  - d. AB words
  - e. BKB Speech in Noise Test
  - f. N/A
  - g. Other (please specify)
- 7) If you perform speech testing, what do you use to present the speech tokens and noise?
  - a. Live voice (your own voice rather than through speakers or headphones)

- b. 1 calibrated speaker
- c. 2 calibrated speakers to present speech and noise from separate locations
- d. Multi speaker array to present speech and noise from multiple locations around the patient
- e. Headphones/Inserts
- f. N/A
- g. Other (Please specify)

8) What are your main barriers/challenges to performing speech testing regularly?

- a. I do not have enough time in clinic
- b. I do not have the necessary equipment
- c. I do not see the benefit
- d. I do not have sufficient training
- e. The tests available are not sensitive enough to detect change (e.g., Changes in hearing aid features/programming)
- f. N/A
- g. Other (please specify)

9) What do you think the benefits of using speech testing in routine adult audiology are?

*[Free text answer]*

10) Do you perform any tests of localisation for adult patients in your audiology clinic?

***[This question was removed from analysis as publication focusses on speech testing only]***

- a. Yes
- b. No
- c. If yes, please specify the types of tests you perform

11) Please select the geographical location of your workplace from the following options:

- a. Scotland
- b. Wales
- c. Ireland
- d. England- Greater London
- e. England- South West
- f. England- South East
- g. England- Midlands
- h. England- North West
- i. England North East

12) Do you use any tests to assess localisation? yes / no
